# Supplementary material for: Evaluation of PRKAA2 Genetic Variation on Metformin Efficacy as an Initial Therapy Among Drug-Naïve Patients With Type II Diabetes Mellitus
Source: Research Square preprint supplement (doi:10.21203/rs.3.rs-107043/v1), 2020-11-24
Supplement: Supplementary file 1 [file 79a568f32c4d40b0f83c7ac8.xlsx]

## Sheet: data_PRKAA2_metformin
GENOTYPE
rs2796498	rs9803799	rs2746342	male=1	age	BMI	WC	HbA1C_pre	FBG_pre	creatinin	GFR	SBP_pre	DBP_pre	met dose I	met dose II	met dose III	mean metformin dose	HbA1C_Post	FBG_post	HDL	TC	TG	LDL	SBP_post	DBP_pre	HbA1C pre	HbA1C post	A1c delta	delta<1.12%=1
AG	TT	TT	1	44	22.8523	81	14.7	413	0.78	110	110	80	1000	1500	1000	1166.67	5.5	92	36	165	207	87.6	120	80	14.7	5.5	9.2	1
GG	TT	GG	2	58	28.6215	88	8.2	148	0.71	94	140	90	1000	1000	1000	1000	7.3	89	41	197	247	106.6	120	80	8.2	7.3	0.9	2
GG	TT	GG	2	51	17.7462	81	9.1	154	0.74	94	140	85	1000	1000	1000	1000	7.5	121	70	233	112	140.6	120	80	9.1	7.5	1.6	1
AG	GT	GT	2	70	21	90	8.5	130	1.18	47	110	70	500	500	500	500	6.8	101	55	144	110	67	120	80	8.5	6.8	1.7	1
GG	TT	GT	2	54	26.1556	82	7	143	0.62	103	140	90	1000	1000	1000	1000	6.9	109	45	231	180	150	140	90	7	6.9	0.1	2
AA	GT	GT	1	55	28.5483	97	9.4	210	0.81	82	130	80	1000	1000	1000	1000	9.1	165	48	212	177	128.6	120	80	9.4	9.1	0.3	2
GG	TT	GG	2	70	21.875	100	11.7	244	0.81	91	170	90	1000	1000	1000	1000	8.2	144	54	215	154	130.2	120	70	11.7	8.2	3.5	1
GG	GG	GG	1	47	21.9076	83	6.5	123	0.76	109	100	70	500	500	500	500	6.5	114	51	188	169	103.2	120	80	6.5	6.5	0	2
GG	TT	GG	1	27	24.0346	81	10.9	295	0.53	145	120	80	1000	1000	1000	1000	7.9	159	55	193	115	115	140	90	10.9	7.9	3	1
GG	TT	GG	2	46	21.5019	87	7.5	134	0.58	111	110	70	1000	1000	1000	1000	7.4	104	38	154	145	87	130	80	7.5	7.4	0.1	2
GG	GT	GG	2	50	25.2241	86	7	114	0.85	80	130	80	1000	1000	1000	1000	6.7	101	51	135	88	66.4	120	80	7	6.7	0.3	2
GG	TT	GG	2	60	27.5535	91	7.8	120	0.66	96	100	70	1000	1000	1000	1000	7.1	105	44	143	112	76.6	130	79	7.8	7.1	0.7	2
GG	TT	GG	1	57	24.4473	86	10	244	0.82	98	120	80	1000	1000	1000	1000	8.2	156	48	177	134	102.2	120	80	10	8.2	1.8	1
GG	GT	GG	1	70	23.8751	88	7	111	1.01	75	120	80	1000	1000	1000	1000	6.8	109	39	189	221	105.8	140	90	7	6.8	0.2	2
AG	TT	GT	2	55	22.719	86	9.3	125	0.81	82	110	70	500	500	500	500	8	94	59	176	84	100.2	120	80	9.3	8	1.3	1
GG	TT	TT	1	62	23.3067	88	7.4	141	0.97	83	110	70	1000	1000	1000	1000	6.7	94	49	177	167	94.6	130	95	7.4	6.7	0.7	2
GG	TT	GG	2	58	24.1415	85	8.2	151	0.54	104	100	70	1000	1000	1000	1000	7.5	120	50	213	174	128.2	110	70	8.2	7.5	0.7	2
GG	TT	GG	2	66	24.2382	87	7.2	149	0.66	92	120	80	1000	1000	1000	1000	7.1	191	52	149	76	81.8	120	80	7.2	7.1	0.1	2
GG	TT	GT	1	67	21.6713	80	9.3	190	0.73	96	100	70	1000	1000	1000	1000	8.8	192	36	181	131	118.8	110	70	9.3	8.8	0.5	2
AG	TT	GT	1	54	22.8329	86	11.1	198	0.63	112	130	80	1000	1000	1000	1000	8.8	176	38	177	162	106.6	120	75	11.1	8.8	2.3	1
GG	TT	GG	1	54	29.7619	104	8.1	162	1.14	73	120	80	1000	1000	1000	1000	8.6	206	41	228	143	158.4	150	80	8.1	8.6	-0.5	2
GG	TT	GT	2	44	21.9289	84	7.3	106	0.61	111	120	80	500	500	500	500	6.4	122	37	174	175	102	120	80	7.3	6.4	0.9	2
GG	TT	GT	1	39	27.3588	91	8.5	162	0.82	111	130	80	1000	1000	1000	1000	7.9	138	38	181	208	101.4	125	75	8.5	7.9	0.6	2
GG	TT	GG	2	57	34.1315	92	7.4	116			120	80	500	500	500	500	6.7	98	36	177	346	71.8	120	80	7.4	6.7	0.7	2
GG	TT	GT	2	50	27.8876	91	9.7	214	0.65	104	130	80	1000	1000	1000	1000	7.5	156	51	189	128	112.4	120	80	9.7	7.5	2.2	1
AG	GT	GT	2	35	28.9461	89	9	176			115	70	1000	1000	1000	1000	7.1	131	46	161	56	103.8	118	70	9	7.1	1.9	1
AG	TT	GT	2	58	18.2222	65	13.4	447	0.41	114	130	70	1000	1500	1500	1333.33	8.4	127	48	155	78	91.4	120	82	13.4	8.4	5	1
AG	TT	GT	1	56	28.7105	91	7.7	120	1.06	78	128	82	500	500	500	500	7.2	119	48	174	87	108.6	128	79	7.7	7.2	0.5	2
AA	TT	TT	2	46	24.3418	89	11.3	226	0.52	115	110	75	1000	1000	1000	1000	9.1	176	56	159	92	84.6	126	73	11.3	9.1	2.2	1
GG	TT	GG	1	76	21.7738	82	9.4	152	0.86	84	140	80	1000	1000	1000	1000	8.8	144	38	156	112	95.6	133	85	9.4	8.8	0.6	2
AG	TT	TT	1	56	27.7177	92	11.4	175	1.0	84	174	86	1000	1500	1000	1166.67	9.3	167	48	161	154	82.2	139	82	11.4	9.3	2.1	1
AG	GT	GT	2	61	21.7778	82	9.8	259	0.57	100	128	82	1000	1000	1000	1000	8.1	124	47	172	97	105.6	123	81	9.8	8.1	1.7	1
AG	TT	GT	1	40	24.2215	82	7.4	125	0.71	117	110	78	500	1000	1000	833.333	9.3	126	47	187	92	121.6	118	81	7.4	9.3	-1.9	2
AG	GT	GT	2	68	23.8054	91	10	204	0.57	89	122	77	1000	1000	1000	1000	8.2	134	41	144	79	87.2	129	84	10	8.2	1.8	1
GG	TT	GT	2	47	21.7502	86	10.9	196	1.16	56	178	96	1000	1000	1000	1000	8.9	147	52	165	89	95.2	135	81	10.9	8.9	2.0	1
AA	TT	TT	2	68	26.7405	92	7.7	102	0.73	79	155	70	500	500	500	500	7.5	106	47	222	204	134.2	136	87	7.7	7.5	0.2	2
AG	GT	GT	2	42	25.1496	88	9.4	107	0.55	116	124	88	1000	1000	1000	1000	8.4	111	59	179	102	99.6	118	77	9.4	8.4	1.0	2
AG	TT	GT	1	69	26.0584	70	8.7	225	0.82	90	137	85	1000	1000	1000	1000	8.4	176	37	165	143	99.4	134	88	8.7	8.4	0.3	2
AG	TT	GT	2	60	28.8889	100	7	157	0.83	77	130	80	500	500	500	500	7.1	96	49	187	98	118.4	122	76	7	7.1	-0.1	2
AG	TT	GT	1	22	23.5294	83	8.5	136	1.28	79	120	80	500	500	500	500	6.8	127	31	147	342	47.6	120	80	8.5	6.8	1.7	1
AG	TT	GT	2	55	24.1288	88	12.2	192	0.59	104	130	80	1000	1000	1000	1000	8.4	122	37	174	175	102	120	80	12.2	8.4	3.8	1
AG	TT	GT	2	56	24.7475	93	7.7	141			130	90	500	500	500	500	7.5	101	48	187	98	119.4	120	80	7.7	7.5	0.2	2
GG	TT	GG	1	48	24.281	92	9.2	205	0.79	106	120	80	1000	1000	1000	1000	8.8	146	52	145	87	75.6	120	80	9.2	8.8	0.4	2
GG	TT	GG	2	59	22.4766	87	13.1	222	0.64	98	110	70	1000	1000	1000	1000	11.5	155	49	165	111	93.8	110	70	13.1	11.5	1.6	1
AG	TT	GT	2	47	25.9151	83	7.6	141	0.61	108	110	70	500	500	500	500	7.1	139	46	179	73	118.4	121	73	7.6	7.1	0.5	2
AG	TT	GT	2	62	33.1069	94	9.2	124	0.73	89	151	59	1000	500	500	666.667	7.2	121	44	293	163	216.4	118	78	9.2	7.2	2.0	1
GG	TT	GT	2	59	29.2184	87	7.3	152	0.73	90	165	85	1000	1000	1000	1000	6.8	102	57	212	90	137	129	79	7.3	6.8	0.5	2
GG	TT	GG	2	46	40.2528	108	10.0	186	0.59	110	150	90	1000	1000	1000	1000	9.2	174	64	208	128	118.4	189	97	10.0	9.2	0.8	2
GG	TT	GG	2	42	27.5312	84	11.1	234	0.56	115	115	70	1000	1000	1000	1000	9.6	190	44	138	74	79.2	120	82	11.1	9.6	1.5	1
AG	TT	TT	2	41	34.2466	100	11.6	223	0.42	128	125	80	1000	1000	1000	1000	11.3	180	46	193	92	128.6	121	77	11.6	11.3	0.3	2
AA	TT	TT	2	45	37.9996	104	7.7	129	0.66	108	152	75	1000	1000	1000	1000	7.8	131	36	220	155	153	132	77	7.7	7.8	-0.1	2
GG	GT	GG	1	47	23.2422	74	9.8	227	0.81	106	199	119	500	1000	1000	833.333	7.7	98	49	112	154	32.2	129	88	9.8	7.7	2.1	1
GG	TT	GT	2	44	26.5255	91	12	211	0.53	116	145	87	500	1000	1000	833.333	8.7	154	66	145	98	59.4	134	86	12	8.7	3.3	1
AG	GG	GT	2	43	26.8407	88	11.3	269	0.57	114	148	94	500	1000	1000	833.333	8.5	132	59	221	161	129.8	127	76	11.3	8.5	2.8	1
AG	TT	GT	2	64	26.1438	68	9.8	225	0.8	78	102	65	500	500	500	500	9.1	172	37	189	132	125.6	134	86	9.8	9.1	0.7	2
AG	TT	GT	2	58	29.4321	82	12.3	216	0.66	98	110	72	1000	1000	1000	1000	10.2	191	45	167	123	97.4	128	81	12.3	10.2	2.1	1
GG	TT	GG	2	61	22.719	78	12.1	199	0.72	91	128	81	1000	1000	1000	1000	9.9	165	43	171	111	105.8	129	83	12.1	9.9	2.2	1
GG	TT	GT	1	54	25.8372	89	10.7	223	0.8	102	121	76	500	500	500	500	8.7	123	49	147	78	82.4	139	84	10.7	8.7	2.0	1
AG	TT	GT	2	41	24.0055	88	11.2	167	0.65	111	132	87	1000	1000	1000	1000	9.8	142	54	155	114	78.2	126	82	11.2	9.8	1.4	1
GG	TT	GT	2	49	22.83	70	9.8	173	0.76	92	172	89	500	500	500	500	5.7	94	48	165	117	93.6	118	79	9.8	5.7	4.1	1
GG	TT	TT	2	55	29.7778	89	11.1	274	0.58	104	147	88	1000	1000	1000	1000	6.2	106	44	157	107	91.6	137	88	11.1	6.2	4.9	1
AG	TT	GT	2	46	22.5215	76	11.9	247	0.59	110	121	78	1000	1000	1000	1000	9.8	167	58	146	114	65.2	125	82	11.9	9.8	2.1	1
GG	TT	GG	2	46	24.1217	89	8.2	198	0.41	124	121	79	1000	1000	1000	1000	7.8	111	61	198	118	113.4	121	81	8.2	7.8	0.4	2
AG	TT	TT	2	51	27.7008	86	9.1	222	0.43	118	114	72	1000	1000	1000	1000	8.9	132	47	143	109	74.2	116	71	9.1	8.9	0.2	2
AG	TT	TT	2	46	20.4518	71	8.8	186	0.56	112	128	82	1000	1000	1000	1000	8.8	145	52	191	91	120.8	125	81	8.8	8.8	0.0	2
GG	TT	GG	1	57	24.8591	94	9.4	244	0.47	123	129	88	1000	1000	1000	1000	8.5	121	48	135	78	71.4	123	82	9.4	8.5	0.9	2
AG	TT	GT	2	59	21.5045	84	10.2	267	0.66	97	119	72	1000	1000	1000	1000	8.9	144	47	154	121	82.8	121	77	10.2	8.9	1.3	2
GG	TT	GT	1	52	24.4473	91	8.2	165	0.57	118	131	82	1000	1000	1000	1000	8.2	154	32	212	154	149.2	129	79	8.2	8.2	0.0	2
GG	TT	TT	2	51	22.1893	82	8.4	154	0.77	90	126	81	1000	1000	1000	1000	8.2	123	48	176	98	108.4	125	81	8.4	8.2	0.2	2
AG	TT	TT	2	49	28.4799	93	8.5	143	0.59	108	147	88	500	500	500	500	8.4	139	38	190	136	124.8	144	87	8.5	8.4	0.1	2
GG	TT	GG	1	54	24.281	92	7.9	159	0.69	108	140	80	500	500	500	500	8.1	110	44	233	277	133.6	130	100	7.9	8.1	-0.2	2
AG	TT	GT	2	44	21.9076	76	7.1	152	0.73	100	100	77	500	500	500	500	7.0	147	57	145	88	70.4	107	72	7.1	7.0	0.1	2
AG	TT	GT	2	50	25.9107	92	7.0	137	0.7	101	160	92	500	500	500	500	6.8	123	68	265	166	163.8	143	102	7.0	6.8	0.2	2
GG	TT	GG	2	50	25.9058	95	9.5	165	1.01	65	131	82	1000	1000	1000	1000	8.7	156	54	176	101	101.8	132	77	9.5	8.7	0.8	2
GG	TT	GG	2	41	23.4952	78	7.2	108	0.75	99	116	72	500	500	500	500	6.5	98	52	175	91	104.8	121	82	7.2	6.5	0.7	2
GG	TT	GT	2	45	24.8358	94	9.9	118	0.59	111	144	88	1000	1000	1000	1000	9.5	121	49	154	144	76.2	131	84	9.9	9.5	0.4	2
GG	TT	GT	2	59	23.9621	87	11.8	242	0.61	100	160	90	500	1000	1000	833.333	10.5	136	47	190	122	118.6	142	82	11.8	10.5	1.3	1
AG	TT	GT	2	58	31.8254	103	9.4	166	0.73	91	130	77	1000	1000	1000	1000	9.2	111	47	175	123	103.4	125	80	9.4	9.2	0.2	2
GG	TT	GT	2	45	22.3703	79	8.3	38	0.49	118	111	71	500	500	500	500	7.8	102	56	144	132	61.6	121	72	8.3	7.8	0.5	2
AG	TT	GT	2	38	41.8642	122	7.5	134	0.48	125	138	90	500	500	1000	666.667	7.7	179	43	176	213	90.4	130	80	7.5	7.7	-0.2	2
GG	TT	GG	2	54	24.653	78	7.5	111	0.59	104	139	85	1000	1000	1000	1000	7.7	111	39	190	170	117	125	85	7.5	7.7	-0.2	2
AG	GT	GT	2	52	26.2227	90	13.1	243	0.57	107	140	99	1000	1000	1000	1000	9.3	174	47	198	134	124.2	130	90	13.1	9.3	3.8	1
GG	GT	GG	2	39	36.1069	102	8.9	161	0.5	122	100	50	1000	1000	1000	1000	7.3	140	46	142	96	76.8	110	80	8.9	7.3	1.6	1
GG	TT	GT	1	51	30.854	95	9	246	0.76	106	155	102	1000	1000	1000	1000	8.1	134	49	212	178	127.4	138	89	9	8.1	0.9	2
AG	TT	GT	2	63	22.3111	78	11.2	161	0.44	108	110	75	1000	1000	1000	1000	10.7	174	36	189	165	120	115	70	11.2	10.7	0.5	2
GG	TT	GG	2	67	18.902	82	7.1	103	0.73	85	146	82	1000	1000	1000	1000	6.8	115	32	168	155	105	132	90	7.1	6.8	0.3	2
AA	TT	TT	2	59	26.6667	90	13.1	273	0.57	102	133	83	1000	1000	1000	1000	10.7	198	41	167	111	103.8	126	84	13.1	10.7	2.4	1
AG	TT	TT	2	54	20.8117	79	12.7	291	0.46	113	139	81	1500	1500	1500	1500	11.6	169	47	212	178	129.4	130	69	12.7	11.6	1.1	2
GG	TT	GT	2	53	24.5578	86	8.3	119	0.65	102	130	79	1000	1000	1000	1000	8.1	126	50	179	98	109.4	122	74	8.3	8.1	0.2	2
GG	TT	TT	1	53	24.6094	92	10.9	169	0.97	89	106	80	1000	1000	1000	1000	9.9	145	51	187	123	111.4	118	72	10.9	9.9	1	2
GG	TT	TT	1	35	19.5312	82	11	240	0.64	127	120	72	1500	1500	1500	1500	9	142	44	156	88	94.4	122	75	11	9	2	1
GG	TT	GG	2	57	20.8889	76	12.8	141	0.76	87	130	84	500	500	500	500	10.1	155	52	178	99	106.2	127	75	12.8	10.1	2.7	1
GG	TT	GG	2	55	23.1247	96.8	10.7	180	0.65	100	120	80	1000	1000	1000	1000	9.2	172	48	167	98	99.4	110	70	10.7	9.2	1.5	1
AG	TT	TT	2	60	27.9292	105	10.6	194	0.99	62	150	90	1500	1000	1000	1166.67	8.4	143	51	211	156	128.8	130	90	10.6	8.4	2.2	1
AG	TT	GT	2	46	26.1328	103	11.5	239	0.61	109	150	80	1500	500	500	833.333	8.2	143	65	209	129	118.2	140	90	11.5	8.2	3.3	1
GG	TT	GG	2	50	21.5019	87	10.6	218	0.56	109	120	80	1000	1000	1000	1000	9.2	154	56	189	112	110.6	110	70	10.6	9.2	1.4	1
GG	TT	GT	2	59	22.7622	92	8.4	145	0.76	86	150	80	1000	500	500	666.667	7.1	98	45	207	118	138.4	140	90	8.4	7.1	1.3	1
AG	TT	GT	2	59	25.356	97	7.9	121	0.79	82	100	70	500	500	500	500	7.2	108	48	193	183	108.4	110	70	7.9	7.2	0.7	2
AG	TT	TT	2	56	22.1204	82	8.8	255	0.95	67	120	80	500	1500	1500	1166.67	10.5	154	42	288	132	219.6	120	80	8.8	10.5	-1.4	2
GG	TT	GG	2	48	23.3726	79	11.0	82	0.90	76	120	80	500	1000	1000	833.333	11.1	167	40	163	168	89.4	120	80	11.0	11.1	-1.1	2
AG	TT	GT	2	62	20.9366	75	7.8	129	1.09	55	130	80	500	500	500	500	6.5	96	64	154	59	78.2	130	90	7.8	6.5	1.3	1
GG	TT	GG	1	56	16.2031	76	8	163	0.93	69	130	80	1000	1000	1000	1000	8	132	72	237	110	143	110	70	8	8	0	2
GG	TT	GG	2	54	28.0843	92	9.2	170	0.65	101	130	70	1000	1000	1000	1000	10.4	188	47	211	170	130	120	80	9.2	10.4	-1.2	2
GG	TT	GG	2	64	18.7962	71	7.8	145	0.65	94	110	70	1000	1000	500	833.333	8.1	121	47	230	259	131.2	110	70	7.8	8.1	-0.3	2
AG	TT	GT	1	70	21.6128	78	8.3	138	1.2	61	145	90	500	500	500	500	7.1	133	40	176	73	121.4	120	90	8.3	7.1	1.2	1
GG	TT	GT	1	42	22.0581	88	10.9	237	0.82	109	120	80	1000	1000	1000	1000	9.3	187	36	210	380	98	120	80	10.9	9.3	1.6	1
